# Supplementary material
Source: PubMed Central journal article supplement (PMC4201964)
Supplement: NIHMS621883-supplement-1.pdf [file NIHMS621883-supplement-1.pdf]

## **Supplementary Figures**

# Supplementary Fig.1

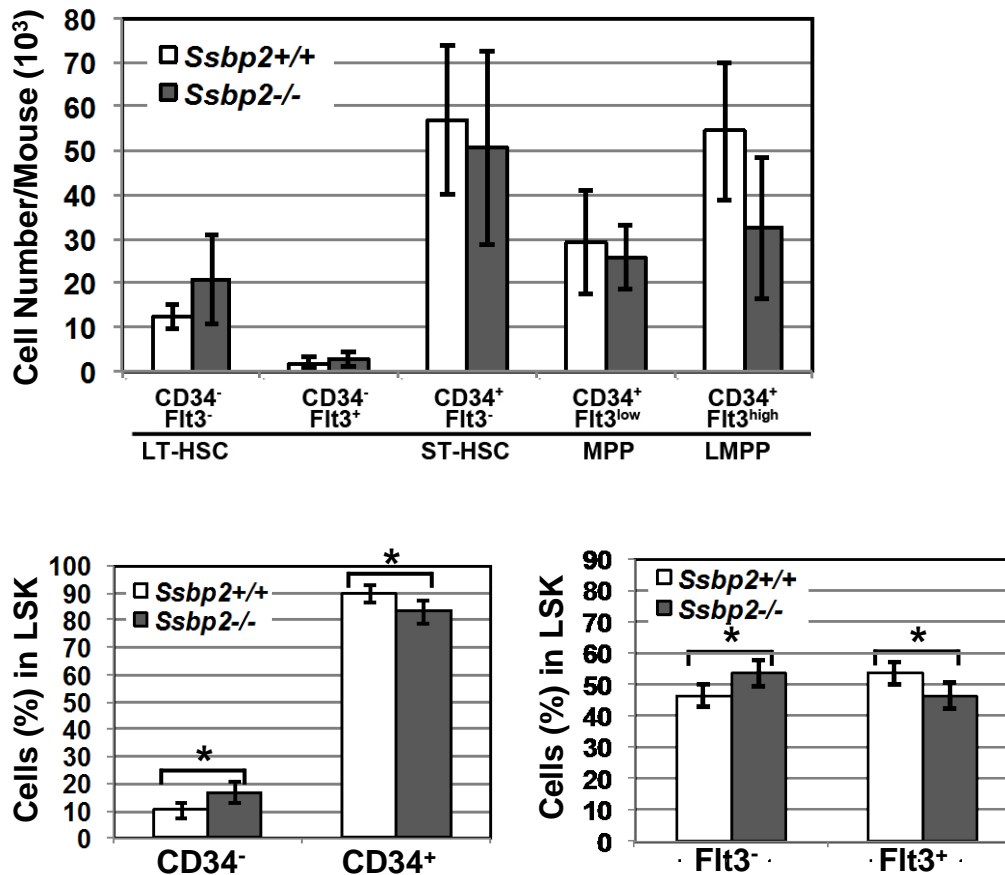

## Supplementary Fig .1 Absolute number of immunophenotypic HSPCs is not significantly altered in *Ssbp2*<sup>-/-</sup> mice.

- A. Data from Fig. 3E were converted to absolute number of cells for each population. No statistically significant alterations in absolute numbers were found.
- B. An increase in the frequency of CD34<sup>-</sup> HSPCs and a modest decrease in the frequency of CD34<sup>+</sup> HSPCs was seen in the null mice.
- C. A slight increase in the frequency of Flt3<sup>-</sup> HSPCs and a modest decrease in the frequency of Flt3<sup>+</sup> HSPCs seen in the null mice is depicted.

# Supplementary Fig.2

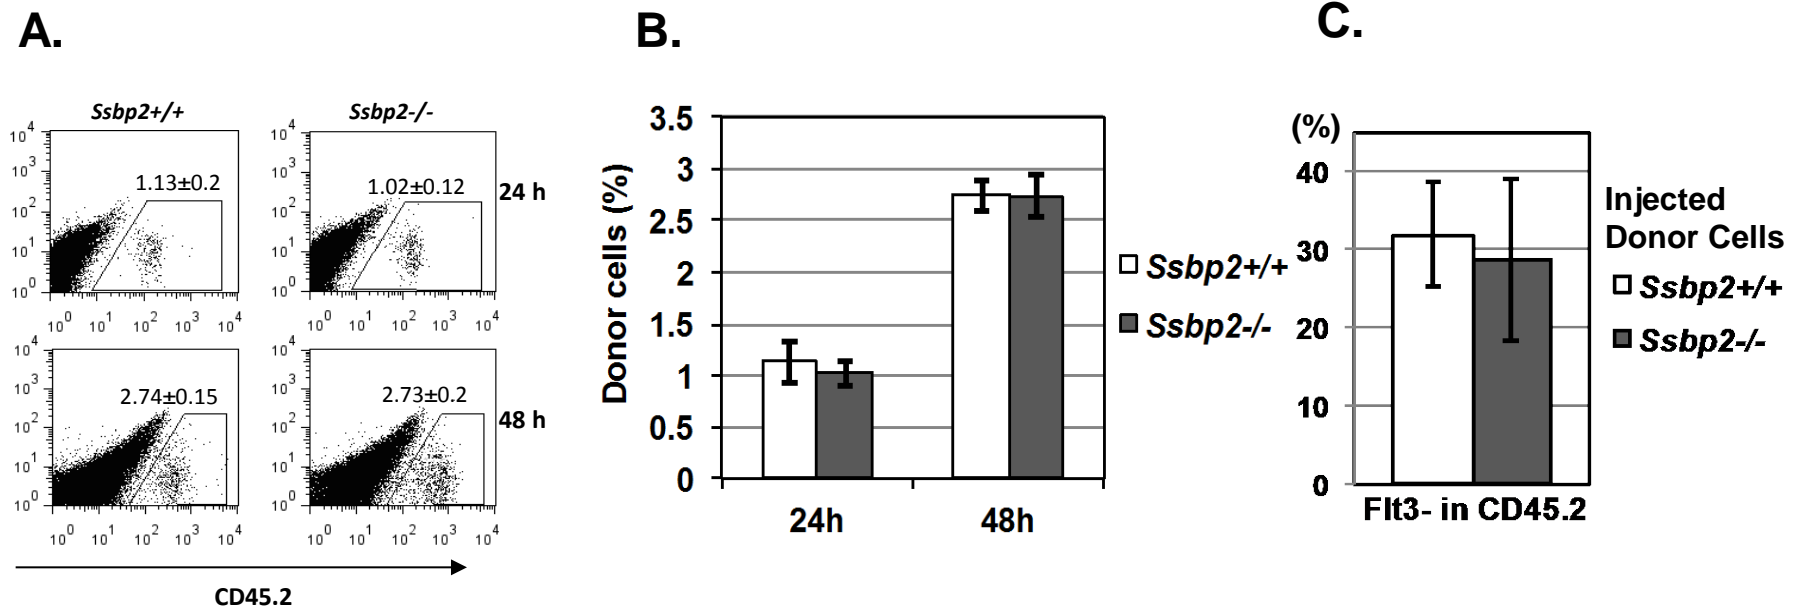

## Supplementary Fig 2. Absence of *Ssbp2* does not affect HSPC homing.

A. Representative flow cytometry analysis of donor cell derived population in *Ssbp2*<sup>-/-</sup> and wild type bone marrow recipients at 24 and 48 hours post transplantation. Donor bone marrow cells from *Ssbp2*<sup>-/-</sup> mice and wild type littermates (CD45.2) were transplanted into sub-lethally irradiated recipient mice (CD45.1). Total bone marrow in recipients was analyzed at 24 and 48 hours post transplantation. B. Statistical analysis of data shown in A. Data represent the mean ± S.D. from 5 individual mice. \*, statistical significance between paired samples at  $p < 0.05$ . C. Donor bone marrow cells from *Ssbp2*<sup>-/-</sup> mice and wild type littermates (CD45.2) transplanted into sub-lethally irradiated recipient mice (CD45.1) were sorted for LSK Flt3<sup>-</sup> compartment at 18 hours post transplant.
